# Supplementary material
Source: bioRxiv or medRxiv preprint supplement (https://www.medrxiv.org/highwire/filestream/94911/field_highwire_adjunct_files/0/2020.08.27.20182550-1.pdf)
Supplement: Supplementary file [file 2020.08.27.20182550-1.pdf]

## Parrot et al. Supplementary figures and tables

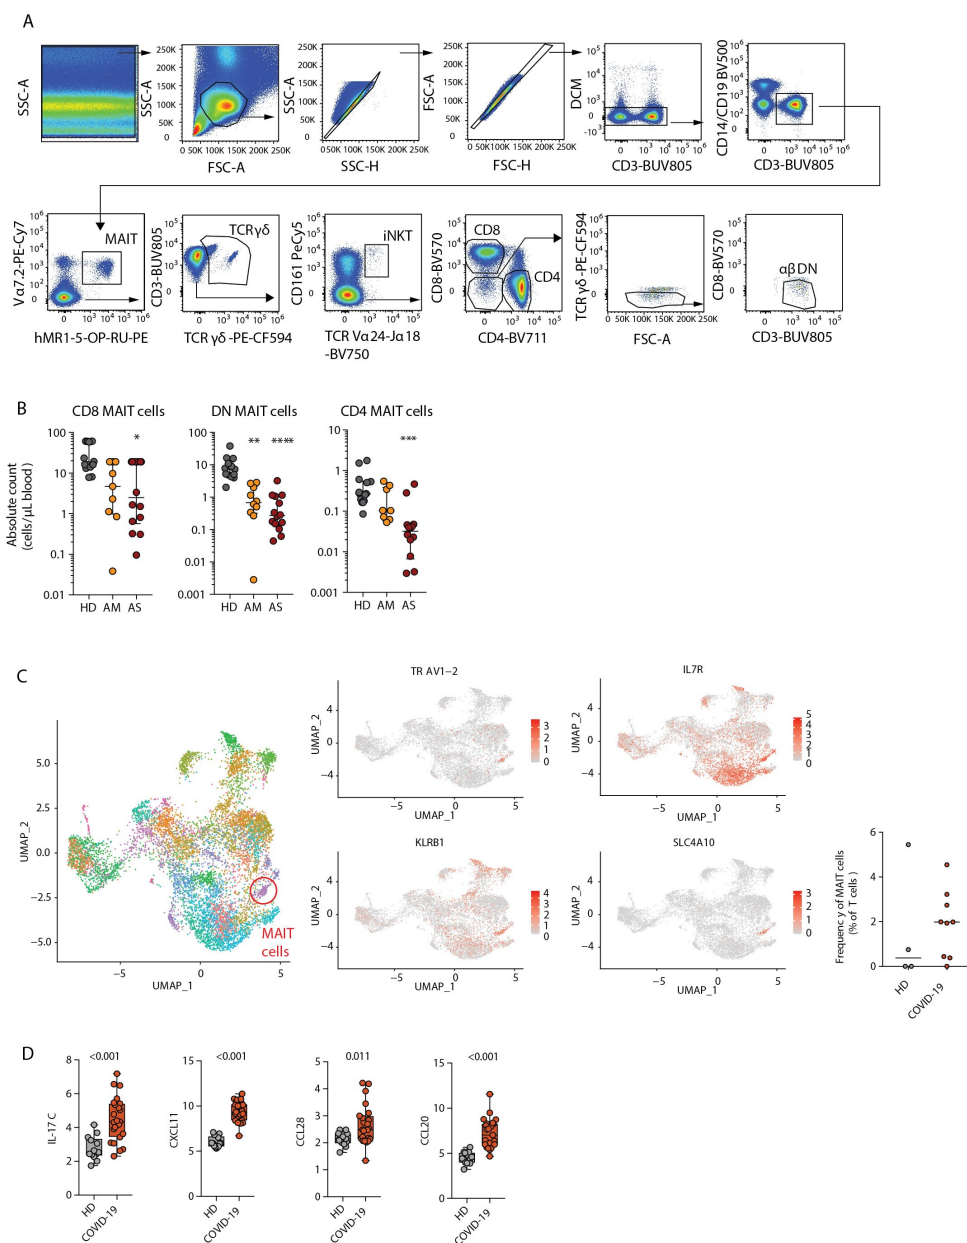

**Fig. S1. Gating strategy, MAIT cell abundance and alteration of soluble factors in COVID-19 patients.** (A) Gating strategy used for the identification of each T cells subsets. (B) Graphs (median  $\pm$  IQR) showing the absolute counts of MAIT cell subsets in healthy control (HD; n=14), acute moderate (AM; n=9) and acute severe (AS; n=15) COVID-19 patients. Non-parametric Kruskal-Wallis test and Dunn's post-hoc test were used to detect significant differences between groups. \* $p$ <0.05, \*\* $p$ <0.01, \*\*\* $p$ <0.001, \*\*\*\* $p$ <0.0001. (C) Left: UMAP plot displaying T cell clusters identified based on gene expression levels in bronchoalveolar lavages (n=4 healthy donors and n=9 COVID-19 patients). Middle: UMAP plots showing expression of the canonical transcripts TRAV1-2, KLRB1, SLC4A10, IL7R used for MAIT cell identification. Right: graphs of MAIT cell frequency in bronchoalveolar lavages from healthy donors (HD) and COVID-19 patients. (D) Box plots comparing IL17C, CXCL11, CCL28 and CCL20 serum levels between Healthy donors (HD, n=14) and COVID-19 patients (n=24). Non-parametric Mann-Whitney test was used to detect significant differences between groups. Horizontal bars indicate medians. Each dot represents one donor. Non-parametric Mann-Whitney U test was used to test for significant differences between groups.

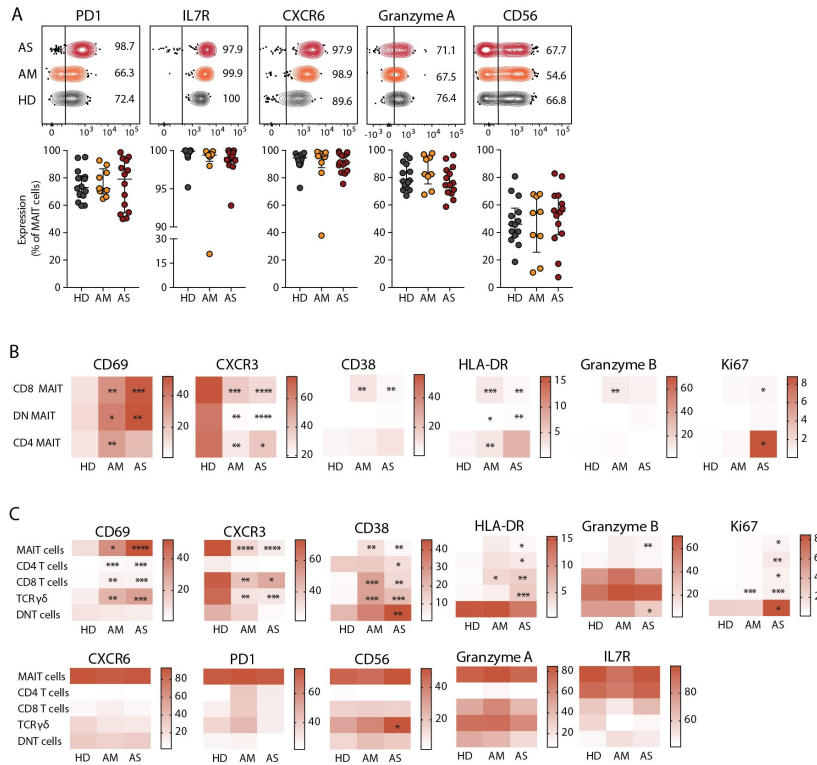

**Fig. S2. Phenotypic alterations of peripheral blood MAIT cells and other T cell subsets in COVID-19 patients. (A)** Top: Illustrative concatenated flow cytometry plots showing the percentage of expression of the indicated phenotypic markers on MAIT cells by patient group. Bottom: graphs (median  $\pm$  IQR) showing the percentage of expression of the indicated markers on MAIT cells in healthy control (HD; n=14), acute moderate (AM; n=9) and acute severe (AS; n=14) COVID-19 patients. Non-parametric Kruskal-Wallis test was used to detect significant differences between groups. \*p<0.05, \*\*p<0.01, \*\*\*p<0.001, \*\*\*\*p<0.0001. **(B)** Heatmaps displaying the percentage of expression of the indicated markers in CD8, CD4 and DN MAIT cells subsets. **(C)** Heatmaps summarizing the percentage of expression of the indicated markers in the identified T cell subsets. \*p<0.05, \*\*p<0.01, \*\*\*p<0.001.

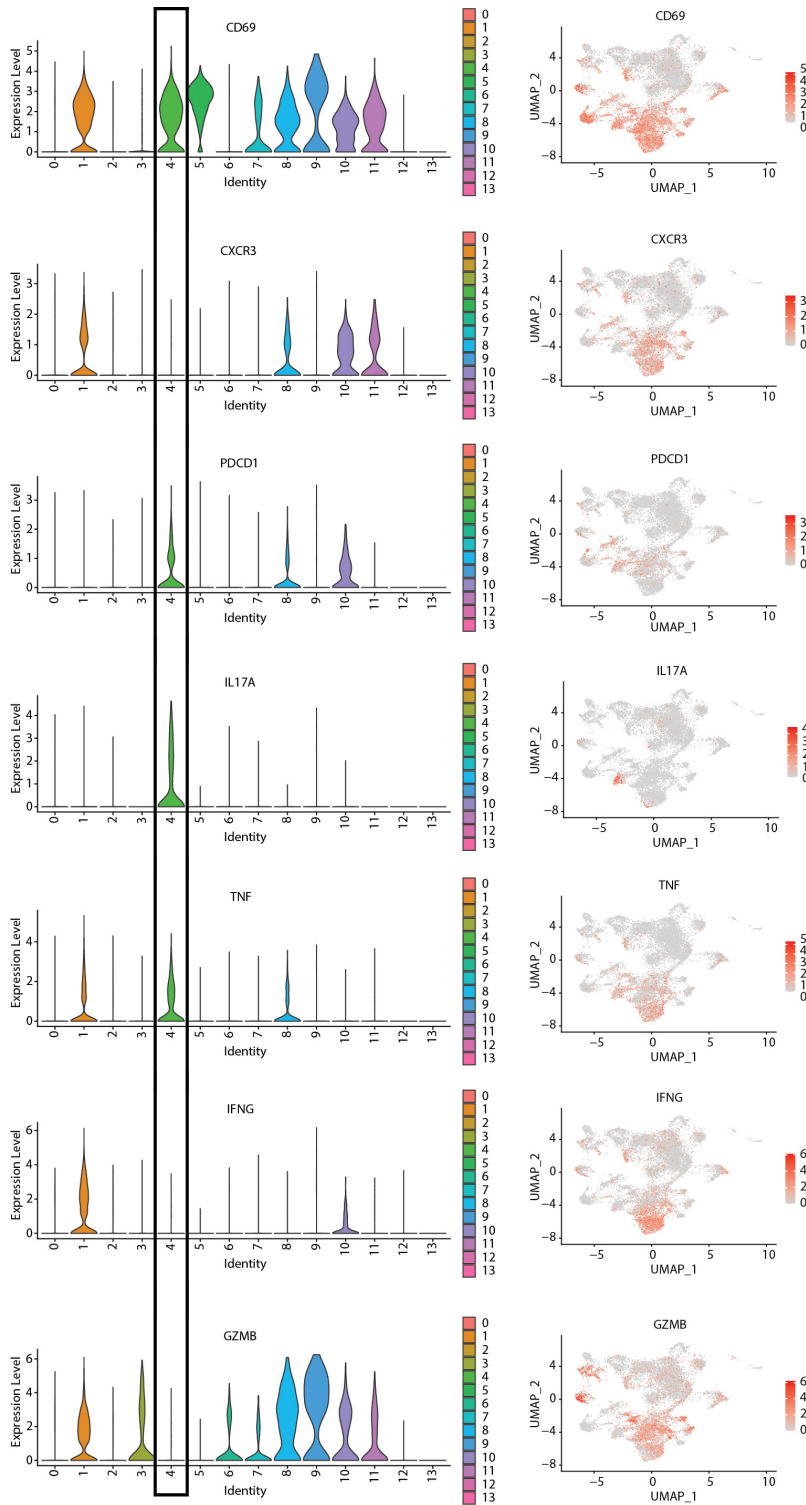

**Fig. S3. Transcriptional profiling of the MAIT cell compartment in the upper respiratory tract.** Left: violin plots of the expression levels of functional transcripts in the thirteen T cell clusters identified in nasopharyngeal swabs (n=5 healthy donors, and n=19 COVID-19 patients). Cluster 4 was identified as the MAIT cell compartment, highlighted with black rectangle. Right: heatmap highlighting the distribution of expression of the indicated transcripts on the UMAP projection.

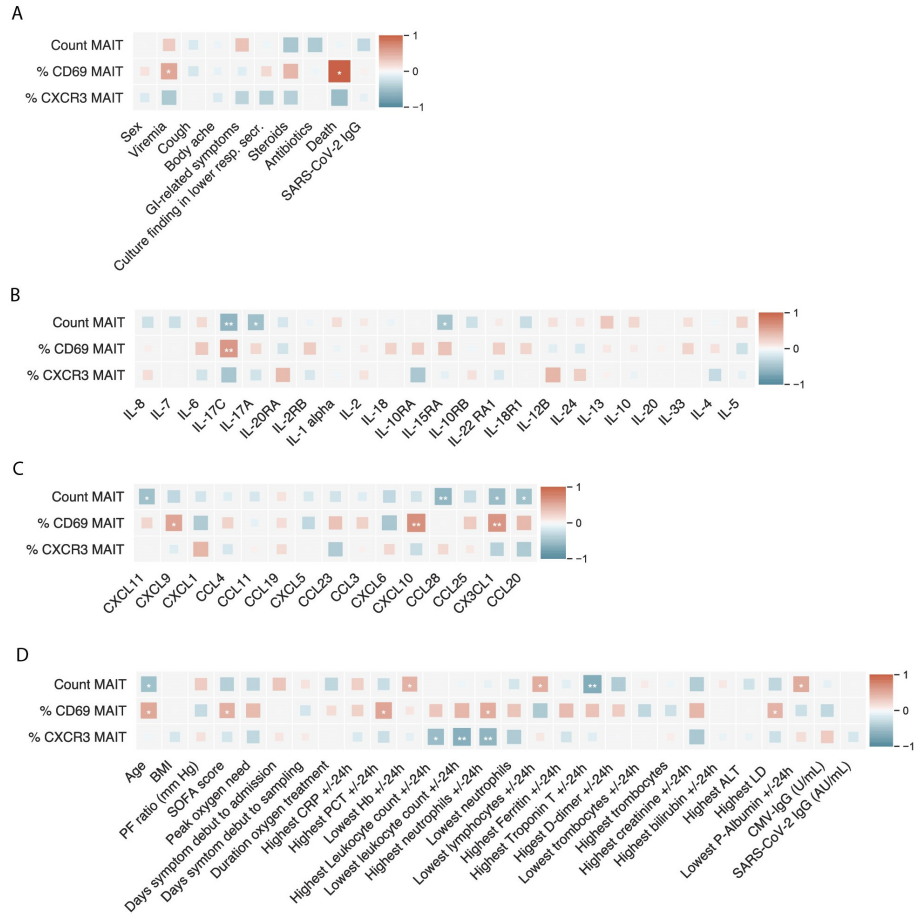

**Fig. S4. Associations and correlations of MAIT cell count and phenotype with clinical parameters, cytokine and chemokine levels in serum. (A)** Heatmap displaying rank-biserial correlations between MAIT cell count, phenotype and clinical parameters in COVID-19 patients. Color indicates effect size and stars indicate Mann-Whitney p-values. **(B)** Heatmap displaying pairwise spearman correlations between MAIT cell count, phenotype and cytokine serum levels in COVID-19 patients. **(C)** Heatmap displaying pairwise spearman correlations between MAIT cell count, phenotype and chemokine serum levels in COVID-19 patients. **(D)** Heatmap displaying pairwise spearman correlations between MAIT cell count, phenotype and clinical parameters in COVID-19 patients. **(B, C, D)** Color indicates the strength of the correlation. \*p<0.05, \*\*p<0.01, \*\*\*p<0.001.

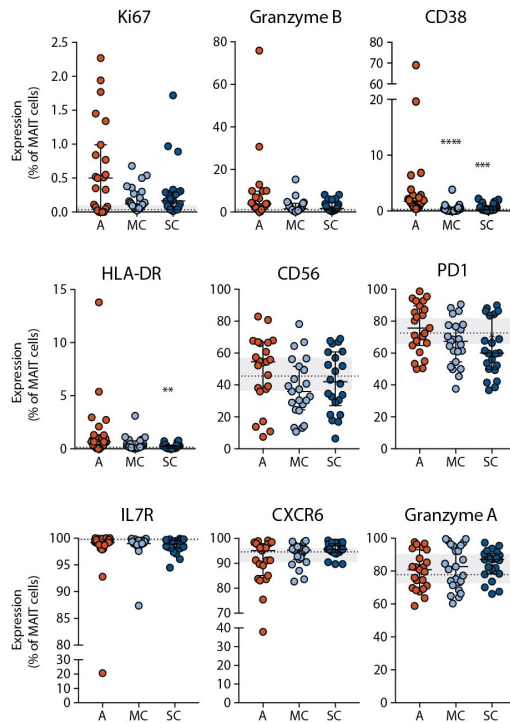

**Fig. S5. Phenotypic comparison of peripheral blood MAIT cells in acute and convalescent COVID-19 patients.** Graphs summarizing MAIT cell phenotype (median  $\pm$  IQR) in acute (A, n=23), moderate severity COVID-19 convalescent (MC, n=23), and severe convalescent (SC, n=22) COVID-19 patients. MAIT cell frequency (median  $\pm$  IQR) in healthy donors (n=14) is shown in gray. Each dot represents one patient. Non-parametric Kruskal-Wallis test and Dunn's post-hoc test were used to detect significant differences between the acute and convalescent groups. \*p<0.05, \*\*p<0.01, \*\*\*p<0.001, \*\*\*\*p<0.0001.

**Table S1.** Demographic and clinical characteristics of the acute COVID-19 Atlas cohort, healthy donors, and convalescent patients.

|                                                                    | Healthy donors | Acute disease Atlas cohort |         | Convalescent cohort |                 |
|--------------------------------------------------------------------|----------------|----------------------------|---------|---------------------|-----------------|
|                                                                    |                | Moderate                   | Severe  | Mild                | Moderate/Severe |
| <b>n</b>                                                           | 14             | 9                          | 15      | 23                  | 22              |
| <b>Age group (median in years)</b>                                 | n/d            | 56                         | 57      | 51                  | 56              |
| 10-29                                                              | 0%             | 11%                        | 0%      | 0%                  | 0%              |
| 30-49                                                              | 21%            | 22%                        | 27%     | 30%                 | 36%             |
| 50-59                                                              | 64%            | 33%                        | 33%     | 48%                 | 27%             |
| 60-69                                                              | 14%            | 22%                        | 27%     | 22%                 | 36%             |
| 70-79                                                              | 0%             | 11%                        | 13%     | 0%                  | 0%              |
| <b>Sex (male/female)</b>                                           | 71%/29%        | 67%/33%                    | 80%/20% | 48%/52%             | 82%/18%         |
| <b>BMI</b>                                                         | n/d            | 28.5                       | 29.5    | n/d                 | n/d             |
| <b>Smoking</b>                                                     | n/d            |                            |         |                     |                 |
| No                                                                 |                |                            | 53%     | 52%                 | 77%             |
| Past                                                               |                |                            | 27%     | 22%                 | 9%              |
| Yes                                                                |                |                            | 13%     | 4%                  | 9%              |
| n/d                                                                |                | 100%                       | 7%      | 26%                 | 5%              |
| <b>Comorbidities</b>                                               | n/d            |                            |         |                     |                 |
| Hypertension                                                       |                | 22%                        | 27%     | 9%                  | 41%             |
| Diabetes                                                           |                | 11%                        | 27%     | 9%                  | 36%             |
| Cardiovascular disease                                             |                | 22%                        | 13%     | 0%                  | 18%             |
| <b>Symptoms at admission</b>                                       |                |                            |         |                     |                 |
| Cough                                                              | n/d            | 89%                        | 80%     | n/d                 | n/d             |
| Body ache                                                          | n/d            | 33%                        | 53%     | n/d                 | n/d             |
| GI related                                                         | n/d            | 11%                        | 20%     | n/d                 | n/d             |
| Fever                                                              | n/d            | 100%                       | 100%    | n/d                 | n/d             |
| Dyspnea                                                            | n/d            | 100%                       | 100%    | n/d                 | n/d             |
| <b>Positive viremia at sampling</b>                                | n/d            | 44%                        | 47%     | n/d                 | n/d             |
| <b>Positive blood culture +/- 5 days from sampling</b>             | n/d            | 0%                         | 20%     | n/d                 | n/d             |
| <b>Positive lower respiratory culture +/- 5 days from sampling</b> | n/d            | 0%                         | 40%     | n/d                 | n/d             |
| <b>SOFA total at sampling</b>                                      | n/d            |                            |         | n/d                 | n/d             |
| 0                                                                  |                | 11%                        | 0%      |                     |                 |
| 1                                                                  |                | 78%                        | 0%      |                     |                 |
| 2                                                                  |                | 11%                        | 7%      |                     |                 |
| 3                                                                  |                | 0%                         | 27%     |                     |                 |
| 4                                                                  |                | 0%                         | 13%     |                     |                 |
| 6                                                                  |                | 0%                         | 33%     |                     |                 |
| 7                                                                  |                | 0%                         | 7%      |                     |                 |

|                                      |     |     |      |     |     |
|--------------------------------------|-----|-----|------|-----|-----|
| 9                                    |     | 0%  | 7%   |     |     |
| 12                                   |     | 0%  | 7%   |     |     |
| <b>NIH Ordinal Scale at sampling</b> | n/d |     |      | n/d | n/d |
| 4                                    |     | 44% | 0%   |     |     |
| 5                                    |     | 78% | 27%  |     |     |
| 7                                    |     | 0%  | 73%  |     |     |
| <b>SOFA-resp at sampling</b>         | n/d |     |      | n/d | n/d |
| 0                                    |     | 22% | 0%   |     |     |
| 1                                    |     | 78% | 0%   |     |     |
| 2                                    |     | 0%  | 7%   |     |     |
| 3                                    |     | 0%  | 67%  |     |     |
| 4                                    |     | 0%  | 27%  |     |     |
| <b>Maximum oxygen treatment</b>      | n/d | 78% | 100% | 0%  | 45% |
| Low flow <15L/min                    |     | 67% | 20%  | n/d | n/d |
| High flow                            |     | 11% | 7%   | n/d | n/d |
| Ventilator                           |     | 0%  | 67%  | n/d | n/d |
| ECMO                                 |     | 0%  | 7%   | n/d | n/d |
| <b>Steroids prior to sampling</b>    | n/d | 22% | 73%  | n/d | n/d |
| <b>Antibiotics prior to sampling</b> | n/d | 33% | 73%  | n/d | n/d |
| <b>COVID-19 specific therapy</b>     | n/d | 0%  | 13%  | 0%  | 18% |
| <b>CMV IgG</b>                       | 71% | 78% | 93%  | n/d | n/d |
| <b>SARS-CoV2 IgG at sampling</b>     | 0%  | 11% | 80%  | n/d | n/d |
| <b>Outcome (deceased)</b>            | n/d | 0%  | 27%  | n/d | n/d |

COVID-19 specific therapies here include antiviral treatment (Remdesivir) or cytokine blockade (Anakinra). BMI: body mass index, GI: Gastrointestinal, CMV: cytomegalovirus, ECMO: extracorporeal membrane oxygenation, n/d: non-determined.

**Table S2.** Demographic and clinical characteristics of the COVID-19 Biobank cohort patients.

|                                                               | <b>Acute disease<br/>Biobank cohort</b> |                 |
|---------------------------------------------------------------|-----------------------------------------|-----------------|
|                                                               | <b>Alive</b>                            | <b>Deceased</b> |
| <b>n</b>                                                      | 7                                       | 7               |
| <b>Age group (median in years)</b>                            | 52                                      | 58              |
| 10-29                                                         | 0%                                      | 0%              |
| 30-49                                                         | 14%                                     | 0%              |
| 50-59                                                         | 57%                                     | 57%             |
| 60-69                                                         | 29%                                     | 43%             |
| 70-79                                                         | 0%                                      | 0%              |
| <b>Genre (male/female)</b>                                    | 86%/14%                                 | 86%/14%         |
| <b>BMI</b>                                                    | 28.4                                    | 28              |
| <b>Smoking</b>                                                | n/d                                     | n/d             |
| <b>Comorbidities</b>                                          |                                         |                 |
| Hypertension                                                  | 57%                                     | 29%             |
| Diabetes                                                      | 0%                                      | 0%              |
| Cardiovascular disease                                        | 0%                                      | 0%              |
| <b>Symptoms at admission</b>                                  | n/d                                     | n/d             |
| <b>Positive viremia at sampling</b>                           | n/d                                     | n/d             |
| <b>Positive blood culture +/- 5 days from sampling</b>        | 71%                                     | 71%             |
| <b>Positive lower respir culture +/- 5 days from sampling</b> | 14%                                     | 0%              |
| <b>NIH Ordinal Scale at sampling</b>                          |                                         |                 |
| 4                                                             | 0%                                      | 0%              |
| 5                                                             | 29%                                     | 0%              |
| 6                                                             | 14%                                     | 0%              |
| 7                                                             | 57%                                     | 100%            |
| <b>SOFA-respir at sampling</b>                                | n/d                                     | n/d             |
| <b>Maximum oxygen treatment</b>                               |                                         |                 |
| Low flow <15L/min                                             | 29%                                     | 0%              |
| High flow                                                     | 0%                                      | 0%              |
| Ventilator                                                    | 71%                                     | 100%            |
| ECMO                                                          | 0%                                      | 0%              |
| <b>Steroids prior to sampling</b>                             | 57%                                     | 57%             |
| <b>Antibiotics prior to sampling</b>                          | n/d                                     | n/d             |
| <b>COVID-19 specific therapy</b>                              | 29%                                     | 14%             |
| <b>CMV IgG</b>                                                | n/d                                     | n/d             |
| <b>SARS-CoV2 IgG at sampling</b>                              | n/d                                     | n/d             |
| <b>Outcome (deceased)</b>                                     | 0%                                      | 100%            |

COVID-19 specific therapies here include antiviral treatment cytokine blockade (Anakinra, Tocilizumab). BMI: body mass index, GI: Gastrointestinal, CMV: cytomegalovirus, ECMO: extracorporeal membrane oxygenation, n/d: non-determined.



**Table S3.** Demographic and clinical data comparison between the acute COVID-19 Atlas cohort and the Biobank cohort.

|                                       | <b>Atlas<br/>n=24</b> | <b>Biobank<br/>n=14</b> | <b>p-value</b> |
|---------------------------------------|-----------------------|-------------------------|----------------|
| <b>Time in hospital</b>               | 17 [10.5-24]          | 34.5 [26.8-38.8]        | 0.016          |
| <b>Days symptom debut to sampling</b> | 14 [11.8-17]          | 25 [21-29]              | <0.001         |
| <b>NIH Ordinal Scale at sampling</b>  | 5 [5-7]               | 7 [7-7]                 | 0.029          |
| <b>Age</b>                            | 56.5 [47.2-63.8]      | 56.5 [52-62.8]          | 0.844          |
| <b>BMI</b>                            | 29 [27-34]            | 28.25 [26.6-31.8]       | 0.381          |
| <b>Highest CRP ± 24h</b>              | 123 [99.5-271.5]      | 91 [46.2-134.2]         | 0.029          |
| <b>Highest neutrophils ± 24h</b>      | 8.35 [5.1-11]         | 8.9 [7.2-11.1]          | 0.496          |
| <b>Lowest lymphocytes ± 24h</b>       | 0.85 [0.5-1.3]        | 0.75 [0.5-1.2]          | 0.867          |
| <b>Highest ferritin ± 24h</b>         | 1480 [546-1944.5]     | 1080 [599-3686]         | 0.742          |
| <b>Highest D-dimer ± 24h</b>          | 1.3 [0.7-2.8]         | 4.85 [1.1-10.2]         | 0.022          |
| <b>Highest LD</b>                     | 8.85 [5.7-11.5]       | 7.3 [6.1-8.6]           | 0.356          |
| <b>Highest creatinine ± 24h</b>       | 71.5 [55-86]          | 78.5 [56.2-134.8]       | 0.596          |
| <b>Highest bilirubin ± 24h</b>        | 8 [6-9.2]             | 10.5 [7-16.8]           | 0.094          |
| <b>Lowest platelets ± 24h</b>         | 324 [230-424]         | 290.5 [247-380.2]       | 0.778          |
| <b>Highest IL-6 ± 5d</b>              | 94.5 [61.2-273]       | 92 [37.2-222]           | 0.626          |

Values are median [Q1-Q3]. p-values were calculated using the unpaired Mann-Whitney test. The time window from measure to sampling is indicated by ±. BMI: body mass index, CRP: c-reactive protein, LD: lactate dehydrogenase.
